# Supplementary material
Source: PubMed Central journal article supplement (PMC8068602)

**Appendix**  
**Seasonal Variability in Weight Gain Among American Indian, Black, White, and Hispanic Children:**  
**A 3.5-Year Study**  
**Lane et al.**

**Appendix Figure 1.** Flowchart of number of children in the sample.

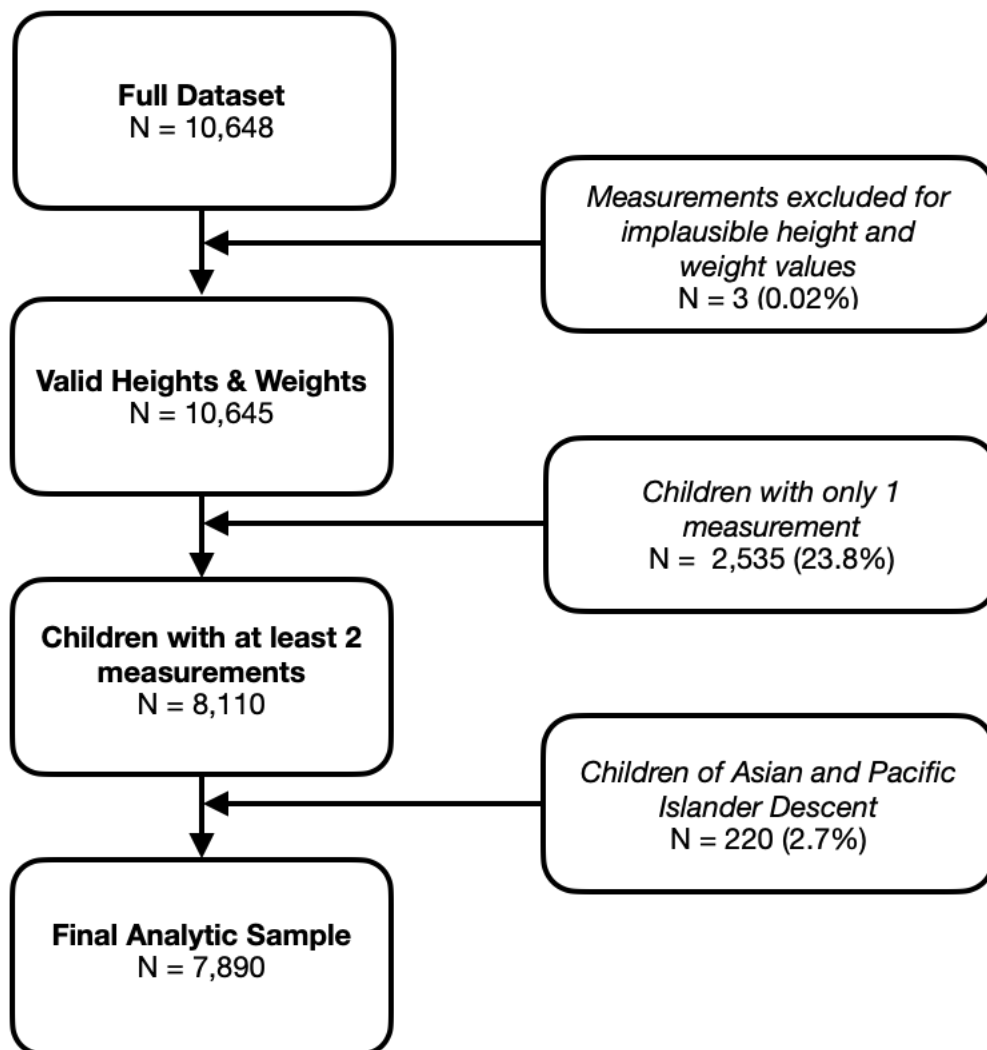

Supplement: NIHMS1669137-supplement-1.pdf [file NIHMS1669137-supplement-1.pdf]
